# Supplementary material for: Artificial Intelligence-Based Classification of Chest X-Ray Images into COVID-19 and Other Infectious Diseases
Source: Int J Biomed Imaging. 2020 Oct 6;2020:8889023. doi: 10.1155/2020/8889023 (PMC7539085; doi:10.1155/2020/8889023)
Supplement: Supplementary 2 — Consists of all the supplementary figures (Figures S1-S3). [file 8889023.f2.xlsx]

## Sheet: Table S1
Note: All the records were downloaded on March 18th, 2020 at 10:45 AM IST
Table S1: Source of original images dataset with numer of images downloaded initially.
Sr. No.	Dataset Type	Data Source	Total number of chest X-ray images of interest downloaded initially
1	COVID-19	https://github.com/ieee8023/covid-chestxray-dataset	120
2	Non-COVID-19	https://github.com/ieee8023/covid-chestxray-dataset	23
3	Pneumonia	https://www.kaggle.com/nih-chest-xrays/data	322
4	TB (Montgomery Country X-ray Set)	https://lhncbc.nlm.nih.gov/publication/pub9931	58
5	Normal (Montgomery Country X-ray Set)	https://lhncbc.nlm.nih.gov/publication/pub9931	80
	Total		603

## Sheet: Table S2
Data Source: https://github.com/ieee8023/covid-chestxray-dataset
Total COVID-19 records downloaded (on March 18th, 2020 at 10:45 AM IST)			120
	Table S2: COVID-19 images dataset preparation.
	Sr.No.	Data Type	Included/Excluded	No. of records
	1	Age not given	Excluded	24
	2	CT images	Excluded	15
	3	View (AP)	Excluded	10
	4	View (AP Supine)	Excluded	10
	5	View (Lateral)	Excluded	9
	6	Age < 19 years	Excluded	1
	7	Others	Included	51
		Total COVID-19 records included in study (age between 25-78 years and PA view of chest X-rays	51
		New COVID-19 images available on Images database from March 19th, 2020 to May 29th, 2020 (After applying the filters given in Table S2)	75
		Images database from March 19th, 2020 to May 29th, 2020

## Sheet: Table S3
Data Source: https://github.com/ieee8023/covid-chestxray-dataset
Total Non-COVID-19 records downloaded (on March 18th, 2020 at 10:45 AM IST)			23
	Table S3: Non-COVID-19 images dataset preparation.
	Sr.No.	Data Type	Included/Excluded	No. of records
	1	Age not given	Excluded	1
	2	View (Lateral)	Excluded	1
	3	ARDS	Included	3
	4	SARS	Included	11
	5	Pneumocystis	Included	1
	6	Streptococcus	Included	6
		Total Non-COVID-19 records included in study (age between 25-74 years and PA view of chest X-rays	21

## Sheet: Table S4
Data Source: https://www.kaggle.com/nih-chest-xrays/data
Total records downloaded (on March 18th, 2020 at 10:45 AM IST)				112121
Records having finding label as Pneumonia				322
	Table S4: Pneumonia images dataset preparation.
	Sr.No.	Data Type	Included/Excluded	No. of records
	1	Age < 19 years	Excluded	39
	2	View (AP)	Excluded	123
	3	Others	Included	160
		Total Pneumonia records included in study (age between 20-84 years and PA view of chest X-rays	160

## Sheet: Table S5
Data Source: https://lhncbc.nlm.nih.gov/publication/pub9931
Total TB records (Montgomery Country X-ray Set) downloaded (on March 18th, 2020 at 10:45 AM IST)			58
	Table S5: TB images dataset preparation.
	Sr.No.	Data Type	Included/Excluded	No. of records
	1	Age < 19 years	Excluded	4
	2	Others	Included	54
		Total TB records included in study (age between 24-89 years and PA view of chest X-rays	54

## Sheet: Table S6
Data Source: https://lhncbc.nlm.nih.gov/publication/pub9931
Total Normal records (Montgomery Country X-ray Set) downloaded (on March 18th, 2020 at 10:45 AM IST)			80
	Table S6: Normal images dataset preparation.
	Sr.No.	Data Type	Included/Excluded	No. of records
	1	Age < 19 years	Excluded	14
	2	Others	Included	66
		Total TB records included in study (age between 19-70 years and PA view of chest X-rays	66

## Sheet: Table S7
Table S7: Distribution of original and augmented images into training and external validation set.
Number of disease / normal chest X-ray images Training dataset (90%)								Number of disease / normal chest X-ray images External validation dataset-I (10%)						External validation dataset-II (Only COVID-19 images available from Images database from March 19th, 2020 to May 29th, 2020)
Sr. No.	Augmentation Type / Original Images	COVID-19	Non-COVID-19	Pneumonia	TB	Normal	Total Images	COVID-19	Non-COVID-19	Pneumonia	TB	Normal	Total Images	New COVID-19
1	Original Images	46	19	144	49	59	317	5	2	16	5	7	35	75
2	HSV (Hue, Saturation, and Value)	46	19	144	49	59	317	5	2	16	5	7	35	75
3	LAB (L* for the lightness from black to white, A* from green to red, and B* from blue to yellow)	46	19	144	49	59	317	5	2	16	5	7	35	75
4	Crop 0.5	46	19	144	49	59	317	5	2	16	5	7	35	75
5	Crop 0.7	46	19	144	49	59	317	5	2	16	5	7	35	75
6	Crop 0.9	46	19	144	49	59	317	5	2	16	5	7	35	75
7	Equalize Histogram	46	19	144	49	59	317	5	2	16	5	7	35	75
8	Flip Horizontal followed by vertical	46	19	144	49	59	317	5	2	16	5	7	35	75
9	Flip Horizontal	46	19	144	49	59	317	5	2	16	5	7	35	75
10	Flip Vertical	46	19	144	49	59	317	5	2	16	5	7	35	75
11	Gamma Correction	46	19	144	49	59	317	5	2	16	5	7	35	75
12	Invert	46	19	144	49	59	317	5	2	16	5	7	35	75
13	Median Blur	46	19	144	49	59	317	5	2	16	5	7	35	75
14	Raise Blue	46	19	144	49	59	317	5	2	16	5	7	35	75
15	Raise Green	46	19	144	49	59	317	5	2	16	5	7	35	75
16	Raise Hue	46	19	144	49	59	317	5	2	16	5	7	35	75
17	Raise Red	46	19	144	49	59	317	5	2	16	5	7	35	75
18	Resize	46	19	144	49	59	317	5	2	16	5	7	35	75
19	Rotate 45 degree	46	19	144	49	59	317	5	2	16	5	7	35	75
20	Rotate 60 degree	46	19	144	49	59	317	5	2	16	5	7	35	75
21	Rotate 90 degree	46	19	144	49	59	317	5	2	16	5	7	35	75
22	Rotate 120 degree	46	19	144	49	59	317	5	2	16	5	7	35	75
23	Rotate 140 degree	46	19	144	49	59	317	5	2	16	5	7	35	75
24	Rotate 160 degree	46	19	144	49	59	317	5	2	16	5	7	35	75
25	Sharpen	46	19	144	49	59	317	5	2	16	5	7	35	75
26	Shearing	46	19	144	49	59	317	5	2	16	5	7	35	75
27	Original and all augmented chest X-ray images	1196	494	3744	1274	1534	8242	130	52	416	130	182	910	1950

## Sheet: Table S8
Table S8: Performance of original and augmented images based models on training, internal and external validation datasets.
Sr. No.	Model Type	Results of the Training, internal validation (N =317)			Results of the external validation (N = 110)
	Augmentation Type	Training Accuracy (N = 286)	Validation Accuracy (N = 31)	Validation Loss	Normal (N = 7)	Covid-19 (N = 5)	New Covid-19 (N = 75)	Non-covid-19 (N = 2)	Pneumonia (N = 16)	Tuberculosis (N = 5)
1	None (Original Images)	100	75	1.3	57.14	80	53.33	50	68.75	60
2	HSV (Hue, Saturation, and Value)	100	75	0.72	42.86	60	32	50	93.75	80
3	LAB (L* for the lightness from black to white, A* from green to red, and B* from blue to yellow)	100	75	1.652	57.14	20	20	0	100	40
4	Crop 0.5	100	81.2	1.11	57.14	60	57.33	0	93.75	40
5	Crop 0.7	100	81.2	0.31	85.71	100	56	50	87.5	80
6	Crop 0.9	100	87.5	0.27	14.29	60	42.67	100	100	60
7	Equalize Histogram	100	81.2	0.63	71.43	100	70.67	50	87.5	40
8	Flip Horizontal followed by vertical	100	81.2	0.34	71.43	40	32	100	93.75	60
9	Flip Horizontal	100	75	0.863	42.86	80	49.33	100	75	60
10	Flip Vertical	100	75	0.82	57.14	80	38.67	100	87.5	40
11	Gamma Correction	100	68	1	42.86	100	64	0	81.25	40
12	Invert	100	62.5	1.28	71.43	60	65.33	50	93.75	60
13	Median Blur	100	56	2.69	42.86	60	32	100	87.5	60
14	Raise Blue	100	68.8	1.6	42.86	80	45.33	50	87.5	60
15	Raise Green	93.8	81.2	0.71	85.71	80	41.33	50	93.75	0
16	Raise Hue	93.8	68.8	1.31	57.14	40	34.67	0	93.75	20
17	Raise Red	100	68.8	2.04	14.29	20	12	50	100	60
18	Resize	100	75	1.36	57.14	0	6.67	0	93.75	40
19	Rotate 45 degree	93.8	93.8	0.18	100	20	24	100	93.75	60
20	Rotate 60 degree	100	68.8	0.52	85.71	40	36	50	100	100
21	Rotate 90 degree	100	62.5	0.66	57.14	100	76	0	56.25	80
22	Rotate 120 degree	100	62	1.49	14.29	20	14.67	100	100	100
23	Rotate 140 degree	100	81.2	0.74	100	100	94.67	0	93.75	0
24	Rotate 160 degree	100	100	0.06	14.29	40	52	0	100	100
25	Sharpen	100	87	0.98	71.43	60	42.67	50	93.75	60
26	Shearing	93.8	75	0.91	71.43	80	93.33	0	87.5	80

## Sheet: Table S9
Table S9: Performance of combined images based models on original and augmented images of external validation datasets.
S.No.	Name of the external dataset	Model 1 (24 epochs)						Model 2 (49 epochs)						Model 3 (101 epochs)
		N*	C*	C**	N-C*	P*	TB*	N*	C*	C**	N-C*	P*	TB*	N*	C*	C**	N-C*	P*	TB*
1	Original Images	71.43	60	44	50	100	80	100	60	41.33	0	100	80	85.71	80	52	50	93.75	80
2	HSV (Hue, Saturation, and Value)	85.71	40	30.67	50	100	80	71.43	60	38.67	50	100	80	85.71	80	48	50	93.75	80
3	LAB (L* for the lightness from black to white, A* from green to red, and B* from blue to yellow)	57.14	40	42.67	50	93.75	60	85.71	60	34.67	50	93.75	60	71.43	40	56	50	93.75	80
4	Crop 0.5	100	40	22.67	0	87.5	80	85.71	40	26.67	0	81.25	100	85.71	40	38.67	50	87.5	80
5	Crop 0.7	71.43	60	33.33	50	87.5	100	71.43	60	30.67	0	75	100	85.71	80	34.67	50	75	100
6	Crop 0.9	71.43	20	29.33	50	87.5	80	85.71	60	34.67	0	93.75	80	85.71	60	38.67	0	87.5	100
7	Equalize Histogram	71.43	60	58.67	50	93.75	80	100	80	57.33	0	100	80	85.71	80	60	0	93.75	80
8	Flip Horizontal followed by vertical	85.71	80	46.67	50	100	60	71.43	80	37.33	100	100	60	71.43	60	49.33	100	100	80
9	Flip Horizontal	85.71	80	45.33	100	93.75	80	100	60	48	100	93.75	80	85.71	80	48	100	100	80
10	Flip Vertical	85.71	40	40	100	81.25	40	71.43	60	40	100	93.75	20	71.43	60	61.33	50	93.75	60
11	Gamma Correction	57.14	40	29.33	50	93.75	60	85.71	60	24	50	93.75	60	85.71	40	30.67	50	93.75	60
12	Invert	42.86	60	61.33	50	100	60	71.43	80	64	50	100	40	85.71	60	49.33	50	100	80
13	Median Blur	71.43	40	38.67	50	100	80	100	60	36	0	100	80	85.71	40	48	50	93.75	80
14	Raise Blue	71.43	60	44	50	100	80	85.71	60	41.33	50	100	80	85.71	80	52	50	93.75	60
15	Raise Green	85.71	60	45.33	50	100	80	100	60	41.33	0	100	80	85.71	80	52	50	93.75	80
16	Raise Hue	71.43	60	44	50	100	80	100	60	41.33	0	100	80	85.71	80	52	50	93.75	80
17	Raise Red	71.43	60	42.67	50	100	80	100	60	38.67	50	100	80	85.71	80	50.67	50	93.75	60
18	Resize	71.43	40	42.67	50	100	80	100	60	41.33	0	93.75	80	85.71	80	52	50	93.75	80
19	Rotate 45 degree	57.14	80	48	100	100	80	85.71	80	52	100	93.75	60	85.71	80	56	50	100	60
20	Rotate 60 degree	85.71	80	52	100	100	80	100	80	65.33	100	100	60	100	100	66.67	100	93.75	80
21	Rotate 90 degree	85.71	80	38.67	50	93.75	60	42.86	60	42.67	50	93.75	60	85.71	80	46.67	50	93.75	60
22	Rotate 120 degree	85.71	80	58.67	50	100	100	71.43	80	64	50	100	80	100	80	68	50	100	60
23	Rotate 140 degree	71.43	60	48	50	100	100	85.71	80	49.33	100	100	80	100	80	65.33	50	100	60
24	Rotate 160 degree	71.43	60	30.67	50	100	60	100	80	53.33	50	100	80	85.71	60	57.33	50	100	80
25	Sharpen	71.43	60	44	50	100	80	85.71	60	46.67	0	100	80	85.71	80	61.33	50	93.75	80
26	Shearing	57.14	40	46.67	0	93.75	60	85.71	60	42.67	50	93.75	80	85.71	80	38.67	50	87.5	60
	*N = Normal (n=7), *C = Covid-19 (n=5), **C = New Covid-19 (n=75), *N-C = Non-covid-19 (n=2), *P = Pneumonia (16), *TB = Tuberculosis (n=5).
